# Supplementary material for: Immune Response of A Novel ATR-AP205-001 Conjugate Anti-hypertensive Vaccine
Source: PubMed Central journal article supplement (PMC5626684; doi:10.1038/s41598-017-12996-y), 2017-10-03
Supplement: 41598_2017_12996_MOESM1_ESM.pdf [file 41598_2017_12996_MOESM1_ESM.pdf]

## Supplementary Information

### Immune Response of A Novel ATR-AP205-001 Conjugate

#### Anti-hypertensive Vaccine

Xiajun Hu<sup>1,2,3,\*</sup>, Yihuan Deng<sup>1,2,3,\*</sup>, Xiao Chen<sup>1,2,3,\*</sup>, Yanzhao Zhou<sup>1,2,3</sup>, Hongrong Zhang<sup>1,2,3</sup>, Hailang Wu<sup>1,2,3</sup>, Shijun Yang<sup>1,2,3</sup>, Fen Chen<sup>1,2,3</sup>, Zihua Zhou<sup>1,2,3</sup>, Min Wang<sup>1,2,3</sup>, Zhihua Qiu<sup>1,2,3</sup>, Yuhua Liao<sup>1,2,3</sup>

<sup>1</sup>Department of Cardiology, Union Hospital, Tongji Medical College, Huazhong University of Science and Technology, Wuhan 430022, China. <sup>2</sup>Institute of Cardiology, Union Hospital, Tongji Medical College, Huazhong University of Science and Technology, Wuhan 430022, China. <sup>3</sup>Key Lab of Molecular Biological Targeted Therapies of the Ministry of Education, Union Hospital, Tongji Medical College, Huazhong University of Science and Technology, Wuhan 430022, China.

\*These authors contributed equally to this work.

Correspondence should be addressed to Y.L. (liaoyh27@163.com) and Z.Q. (qiu\_zhихua512@163.com)

Supplementary Figure S1

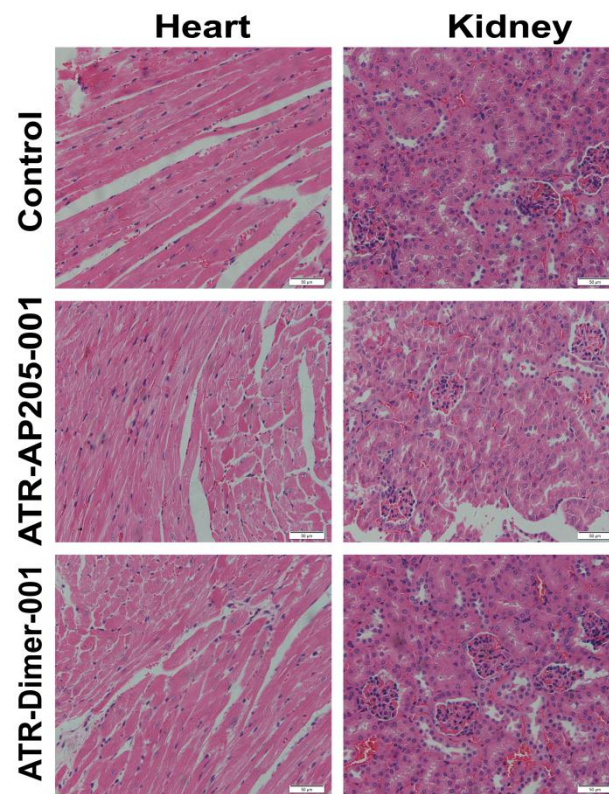

**Figure S1.** No immunologic damages were observed after ATR-AP205-01 or ATR-Dimer-001 vaccination. H&E staining of heart and kidney from mice after 5 times vaccination (n=6 per group). Scale bars, 50 $\mu$ m.

## Supplementary Figure S2

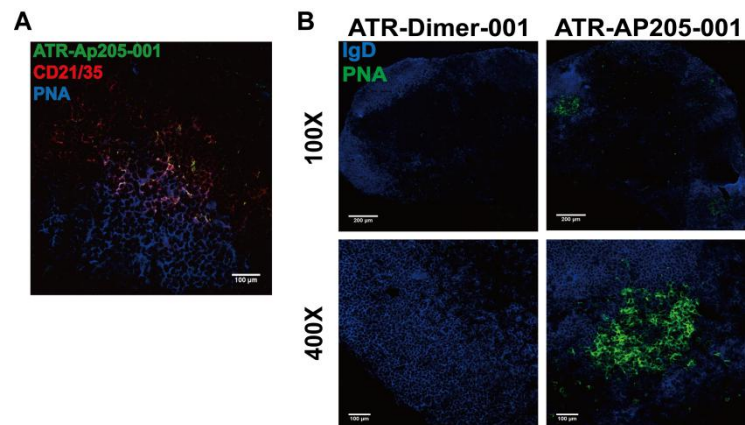

**Figure S2.** Early GC formation 4 days after ATR-AP205-001 vaccination. (A) Colocalization of GC (blue) and FDCs (red) presenting ATR-AP205-001 (green). Scale bars, 200μm. (B) GC staining 4 days after ATR-Dimer-001 or ATR-AP205-001 vaccination. 100X, Scale bars, 200μm. 400X, Scale bars, 100μm.

### Supplementary Figure S3

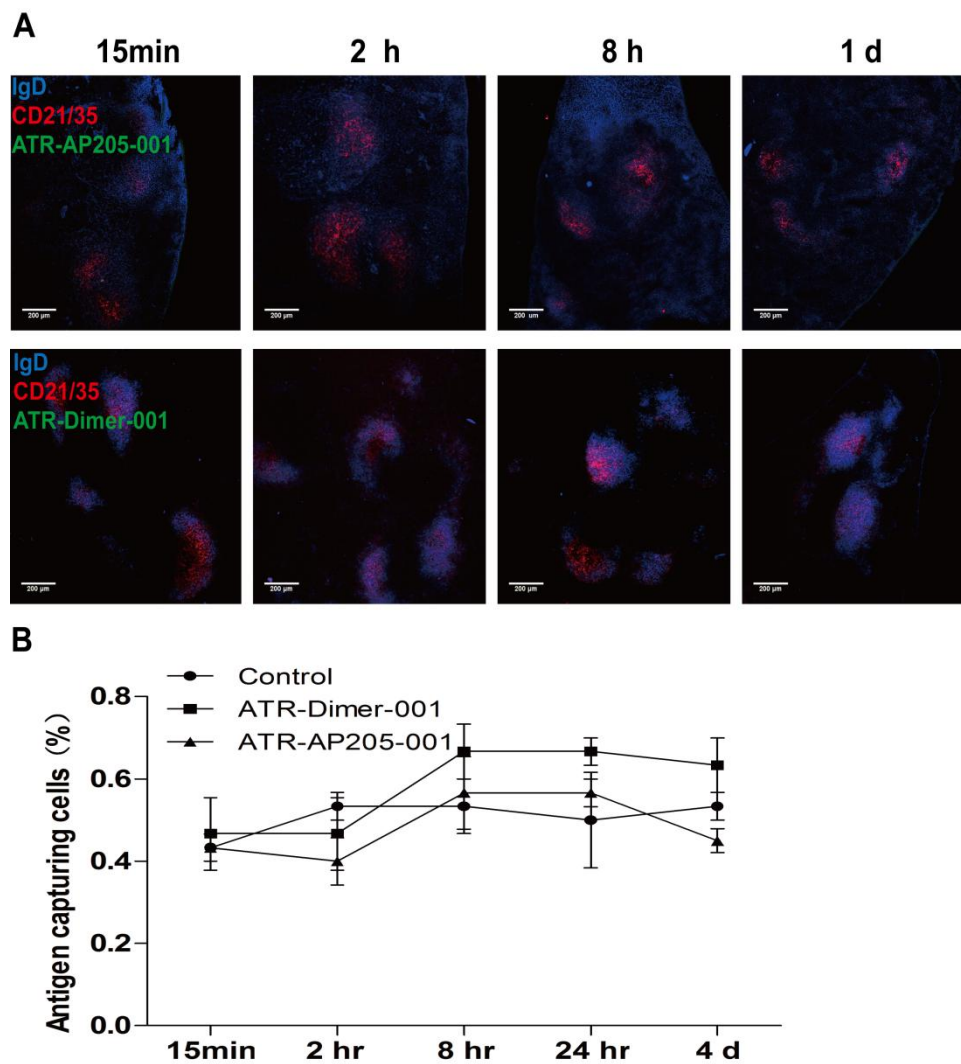

**Figure S3.** No fluorescent ATR-AP205-001 or ATR-Dimer-001 were observed in spleen. (A) Fluorescent images of spleen after immunization (n=6 per group). Scale bars, 200  $\mu$ m. (B) Percentages of Antigen-capturing cells in total cells determined by flow cytometry (n=6 per group). Data are presented as mean  $\pm$  SEM.

Supplementary Figure S4

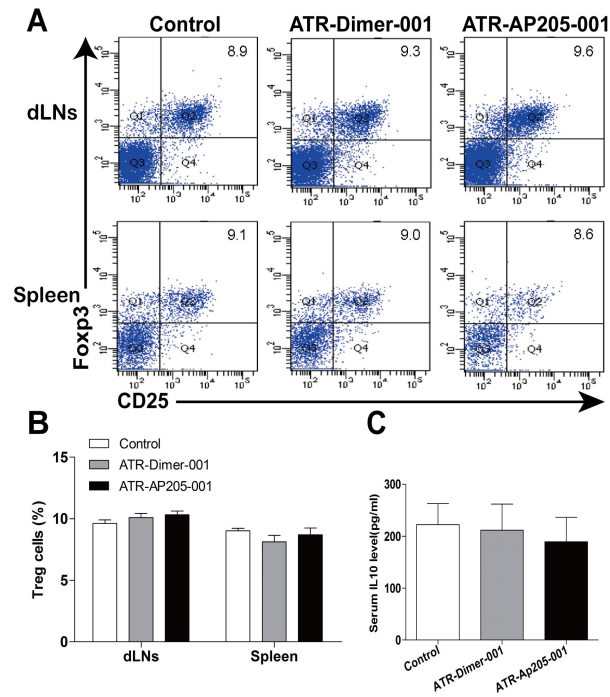

**Figure S4.** No Treg cells differentiation was observed after multiple vaccination. (A) Treg (CD25<sup>+</sup>Foxp3<sup>+</sup>) gated on CD4<sup>+</sup> T cells. (B) Percentages of Treg cells in CD4<sup>+</sup> T cells after 5 times immunization (n=7 per group). (C) Serum IL10 concentration (n=7 per group). Data are presented as mean  $\pm$  SEM.

## Supplementary Figure S5

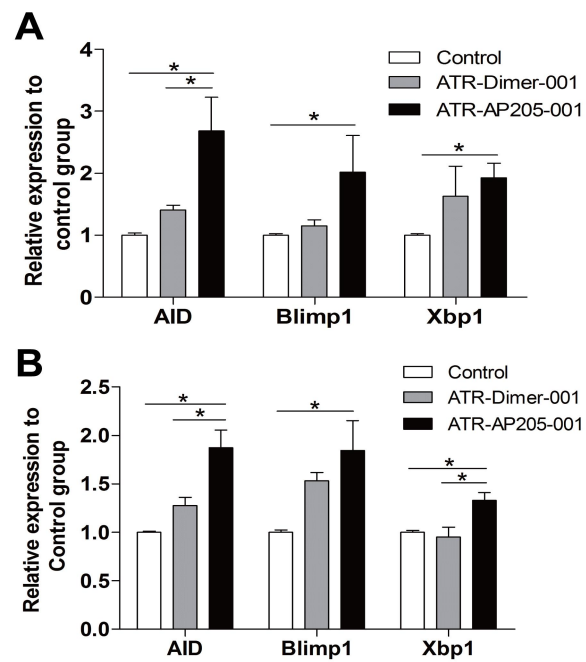

**Figure S5.** Relative mRNA expression of AID, Blimp1 and Xbp1 in dLNs and spleen on day 14 (n=7 per group). Data are presented as mean  $\pm$  SEM. \*P < 0.05.

## Supplementary Figure S6

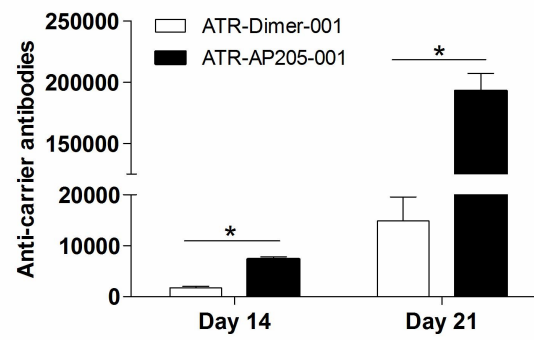

**Figure S6.** Antibody titers against the carriers in ATR-Dimer-001 or ATR-AP205-001 group. Data are presented as mean  $\pm$  SEM. \*P < 0.05 vs ATR-Dimer-001 group.

Supplementary Figure S7

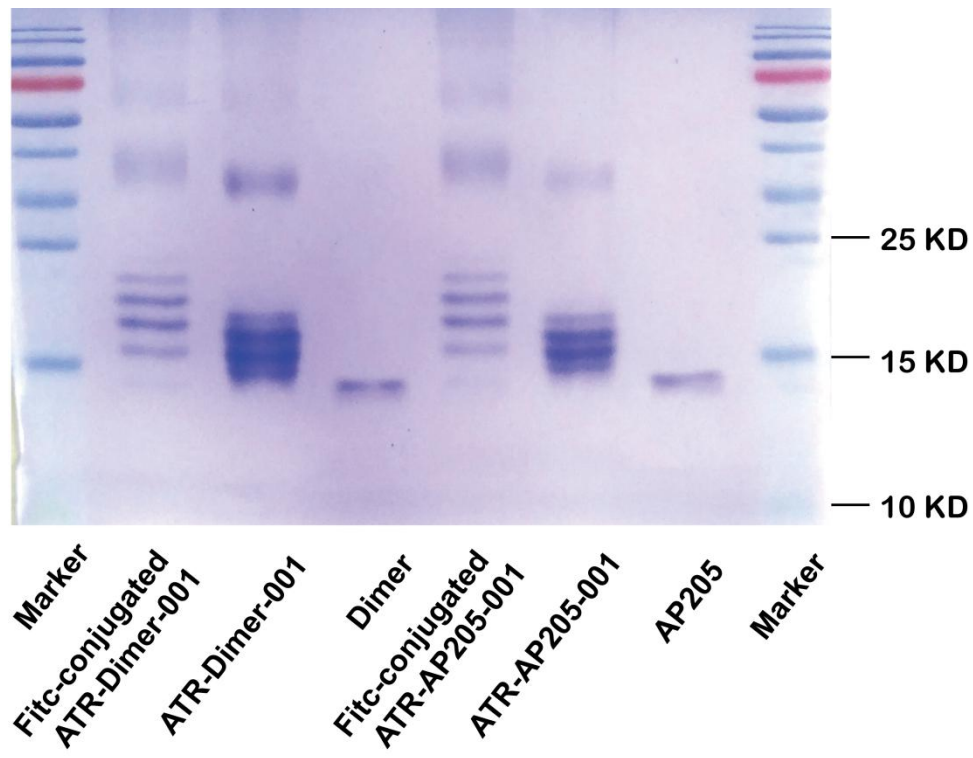

**Figure S7.** SDS-PAGE analysis of carriers and vaccines by eluting gel stained with coomassie brilliant blue.
